# Supplementary material for: The Effects of an Infant Formula Enriched with Milk Fat Globule Membrane, Long-Chain Polyunsaturated Fatty Acids and Synbiotics on Child Behavior up to 2.5 Years Old: The COGNIS Study
Source: PubMed Central journal article supplement (PMC7765166; doi:10.3390/nu12123825), 2020-12-15
Supplement: nutrients-12-03825-s001.pdf [file nutrients-12-03825-s001.pdf]

**Table S1.** Nutritional composition of the Standard (SF) and Experimental (EF) Infant Formulas used in the COGNIS study.

|                                                                                       | Standard Formula (SF) |                | Experimental Formula (EF) |                         |
|---------------------------------------------------------------------------------------|-----------------------|----------------|---------------------------|-------------------------|
|                                                                                       | Initiation            | Follow-on      | Initiation                | Follow-on               |
|                                                                                       | 100 ml (13.5%)        | 100 ml (14.5%) | 100 ml (13.5%)            | 100 ml (14.5%)          |
| <b>Energy (kcal/kJ)</b>                                                               | 69/288                | 70/294         | 68/285                    | 69/290                  |
| <b>Proteins (g)</b>                                                                   | 1.35                  | 1.8            | 1.35                      | 1.8                     |
| Casein/whey (%)                                                                       | 40/60                 | 50/50          | 40/60                     | 50/50                   |
| <b>Carbohydrates (g)</b>                                                              | 7.97                  | 8.5            | 7.56                      | 8.1                     |
| Lactose (g)                                                                           | 7.17                  | 7.2            | 6.82                      | 7.3                     |
| Maltodextrin (g)                                                                      | 0.8                   | 1.3            | 0.7                       | 0.8                     |
| <b>Fat (g)</b>                                                                        | 3.5                   | 3.2            | 3.5                       | 3.2                     |
| LA (mg)                                                                               | 579                   | 517            | 569                       | 517                     |
| $\alpha$ -ALA (mg)                                                                    | 49                    | 45             | 49                        | 45                      |
| ARA (mg)                                                                              | -                     | -              | 15.8                      | 10.2                    |
| DHA (mg)                                                                              | -                     | -              | 11.2                      | 10.2                    |
| <b>Gangliosides (mg/L)</b>                                                            | 1.5                   | 1.5            | 9                         | 9                       |
| <b>Sialic acid (mg/L)</b>                                                             | 82                    | 80             | 105                       | 105                     |
| <b>MFGM-10 (wt/wt)</b>                                                                | -                     | -              | 10%                       | 10%                     |
| <b>Nucleotides (mg)</b>                                                               | -                     | -              | 2.92                      | 2.94                    |
| Cytidine-5'-Monophosphate (mg)                                                        | -                     | -              | 1.09                      | 1.12                    |
| Uridine-5'-Monophosphate (mg)                                                         | -                     | -              | 0.88                      | 0.9                     |
| Adenosine-5'-Monophosphate (mg)                                                       | -                     | -              | 0.41                      | 0.41                    |
| Guanosine-5'-Monophosphate (mg)                                                       | -                     | -              | 0.27                      | 0.26                    |
| Inosine-5'-Monophosphate (mg)                                                         | -                     | -              | 0.27                      | 0.26                    |
| <b>Prebiotics</b>                                                                     |                       |                |                           |                         |
| FOS: Inulin (1:1)                                                                     | -                     | -              | 0.4                       | 0.4                     |
| <b>Probiotics</b>                                                                     |                       |                |                           |                         |
| <i>Bifidobacterium L. infantis</i> CECT7210<br>( <i>Bifidobacterium infantis</i> IM1) | -                     | -              | 1x10 <sup>7</sup> cfu/g   | 1x10 <sup>7</sup> cfu/g |
| <i>Lactobacillus rhamnosus</i> LCS-742                                                | -                     | -              | 1x10 <sup>7</sup> cfu/g   | 1x10 <sup>7</sup> cfu/g |

ARA: Arachidonic acid; cfu: colony forming unit; DHA: Docosahexaenoic acid; FOS: Fructooligosaccharides; LA: Linoleic acid; MFGM: Milk Fat Globule Membrane;  $\alpha$ -ALA:  $\alpha$ -Linolenic acid. Power diluted 13.5% (13.5 g infant formula made up to 100 ml with water); Power diluted 14.5% (14.5 g infant formula made up to 100 ml with water). Both standard and experimental Initiation infant formulas were prolonged from birth/2 months till 6 months of life; then, infants received corresponding Follow-on formula from 6 to 18 months of age.

**Table S2.** Effects of SF, EF or BF on CBCL scores at 18 months and 2.5 years old in infants participating in the COGNIS study.

| CBCL Scales                    | 18 months |           |           |       |                    |             |            | 2.5 years old          |                          |                        |              |                    |            |            |
|--------------------------------|-----------|-----------|-----------|-------|--------------------|-------------|------------|------------------------|--------------------------|------------------------|--------------|--------------------|------------|------------|
|                                | SF (n=47) | EF (n=48) | BF (n=37) | $p^1$ | $P_{adj}^\ddagger$ | F(df)       | $\eta_p^2$ | SF (n=29)              | EF (n=41)                | BF (n=33)              | $p^1$        | $P_{adj}^\ddagger$ | F(df)      | $\eta_p^2$ |
| <i>Internalizing Problems</i>  | 49.8±8.3  | 50.1±9.2  | 47.4±9.1  | 0.33  | 0.81               | 0.21(2,112) | 0.00       | 55.1±11.3 <sup>a</sup> | 51.0±10.6 <sup>a,b</sup> | 47.8±10.8 <sup>b</sup> | <b>0.035</b> | 0.37               | 1.02(2,94) | 0.02       |
| <i>Externalizing Problems</i>  | 51.8±7.4  | 51.0±8.9  | 49.7±8.4  | 0.52  | 0.70               | 0.35(2,112) | 0.01       | 55.2±9.2 <sup>a</sup>  | 49.3±9.1 <sup>b</sup>    | 47.5±10.1 <sup>b</sup> | <b>0.005</b> | 0.10               | 2.40(2,94) | 0.05       |
| <i>Total Problems</i>          | 51.7±7.5  | 51.2±10.0 | 50.0±9.1  | 0.69  | 0.61               | 0.49(2,112) | 0.01       | 56.3±11.3 <sup>a</sup> | 51.1±9.4 <sup>a,b</sup>  | 48.8±10.9 <sup>b</sup> | <b>0.017</b> | 0.27               | 1.37(2,94) | 0.03       |
| <i>Affective Problems</i>      | 54.8±4.6  | 56.5±7.9  | 54.5±5.3  | 0.35  | 0.74               | 0.31(2,112) | 0.01       | 57.7±7.8               | 54.9±4.6                 | 56.6±6.8               | 0.18         | 0.19               | 1.67(2,94) | 0.03       |
| <i>Anxiety Problems</i>        | 53.4±4.2  | 54.0±5.1  | 53.9±5.3  | 0.83  | 0.57               | 0.57(2,112) | 0.01       | 56.9±8.6               | 56.1±7.4                 | 55.4±7.1               | 0.75         | 0.98               | 0.02(2,94) | 0.00       |
| <i>Perv. Develop. Problems</i> | 54.2±5.7  | 55.0±7.2  | 54.4±6.8  | 0.82  | 0.91               | 0.09(2,112) | 0.00       | 57.4±8.7               | 56.5±6.8                 | 54.1±4.7               | 0.14         | 0.65               | 0.43(2,94) | 0.01       |
| <i>ADHD</i>                    | 54.7±5.6  | 54.0±5.5  | 54.9±5.2  | 0.72  | 0.44               | 0.83(2,112) | 0.02       | 56.1±6.6 <sup>a</sup>  | 53.7±5.1 <sup>a,b</sup>  | 52.7±4.2 <sup>b</sup>  | <b>0.039</b> | 0.56               | 0.60(2,94) | 0.01       |
| <i>Op. Def. Problems</i>       | 53.0±4.1  | 52.8±4.9  | 52.1±3.2  | 0.56  | 0.77               | 0.26(2,112) | 0.01       | 55.3±5.1               | 53.5±5.9                 | 52.6±4.7               | 0.13         | 0.57               | 0.58(2,94) | 0.01       |

Data are presented as means±SD of typical scores.  $p^1$  is ANOVA test for normally distributed variables. Values not sharing the same suffix (ab) were significantly different in a Bonferroni *post hoc* test. Bold:  $p$  value <0.05.  $P_{adj}^\ddagger$  is ANCOVA for the group differences using the univariate general linear model, including confounder factors: maternal educational level, maternal IQ, smoking during pregnancy, paternal educational level and place of residence.  $P_{adj}^\ddagger$  is ANCOVA for the group differences using the univariate general linear model, including confounder factors: maternal educational level, socioeconomic status and place of residence. F-values (F) and effect sizes ( $\eta_p^2$ ) were calculated by ANCOVAs. ADHD: Attention Deficit/Hyperactivity Disorders; BF: Breastfed infants; df: degrees of freedom; EF: Experimental infant formula; Op. Def.: Oppositional Defiant; Perv. Develop: Pervasive Developmental; SF: Standard infant formula.

**Table S3.** Association of maternal IQ and educational level, smoking during pregnancy, paternal educational level, place of residence and three COGNIS study groups with children behavioral outcomes at 18 months of life.

| CBCL Scales                    | Maternal IQ     |                       | Maternal educational level (Secondary) |                       | Smoking during pregnancy |                       | Paternal educational level (Secondary) |                       | Place of residence (Urban) |                       | SF group        |                       | EF group         |                       |
|--------------------------------|-----------------|-----------------------|----------------------------------------|-----------------------|--------------------------|-----------------------|----------------------------------------|-----------------------|----------------------------|-----------------------|-----------------|-----------------------|------------------|-----------------------|
|                                | OR (95% CI)     | <i>p</i> <sup>1</sup> | OR (95% CI)                            | <i>p</i> <sup>1</sup> | OR (95% CI)              | <i>p</i> <sup>1</sup> | OR (95% CI)                            | <i>p</i> <sup>1</sup> | OR (95% CI)                | <i>p</i> <sup>1</sup> | OR (95% CI)     | <i>p</i> <sup>1</sup> | OR (95% CI)      | <i>p</i> <sup>1</sup> |
| <i>Internalizing Problems</i>  | 0.95(0.91-0.97) | <b>0.010</b>          | 0.90(0.13-6.51)                        | 0.93                  | 1.80(0.47-6.84)          | 0.39                  | 1.30(0.11-15.22)                       | 0.84                  | 1.14(0.25-5.18)            | 0.86                  | 0.58(0.11-3.00) | 0.51                  | 0.51(0.10-2.60)  | 0.42                  |
| <i>Externalizing Problems</i>  | 0.97(0.94-1.01) | 0.17                  | 1.57(0.33-7.51)                        | 0.57                  | 0.67(0.11-3.93)          | 0.66                  | 0.53(0.15-3.57)                        | 0.70                  | 0.80(0.20-3.18)            | 0.75                  | 1.02(0.22-4.84) | 0.98                  | 0.69(0.15-3.21)  | 0.64                  |
| <i>Total Problems</i>          | 0.97(0.93-1.00) | <b>0.048</b>          | 1.23(0.15-10.37)                       | 0.85                  | 0.76(0.19-3.01)          | 0.70                  | 0.73(0.15-3.57)                        | 0.70                  | 1.14(0.36-3.59)            | 0.83                  | 0.67(0.17-2.64) | 0.56                  | 0.63(0.17-2.39)  | 0.50                  |
| <i>Affective Problems</i>      | 0.98(0.91-1.07) | 0.72                  | N/A                                    | N/A                   | 1.10(0.08-14.44)         | 0.94                  | N/A                                    | N/A                   | 0.33(0.04-2.83)            | 0.31                  | 0.51(0.04-6.04) | 0.59                  | 1.73(0.30-10.08) | 0.54                  |
| <i>Anxiety Problems</i>        | 0.98(0.92-1.05) | 0.57                  | N/A                                    | N/A                   | 3.59(0.56-23.04)         | 0.18                  | N/A                                    | N/A                   | 1.53(0.24-9.79)            | 0.65                  | 0.16(0.01-2.73) | 0.21                  | 0.52(0.06-4.74)  | 0.56                  |
| <i>Perv. Develop. Problems</i> | 0.97(0.93-1.02) | 0.21                  | 0.63(0.05-7.90)                        | 0.72                  | 0.40(0.05-3.39)          | 0.40                  | 0.69(0.07-6.84)                        | 0.75                  | 1.24(0.24-6.52)            | 0.80                  | 0.55(0.10-3.21) | 0.51                  | 0.50(0.10-2.60)  | 0.41                  |
| <i>ADHD</i>                    | 0.95(0.90-1.01) | 0.10                  | 6.86(1.14-41.43)                       | <b>0.036</b>          | 0.74(0.08-7.18)          | 0.80                  | 2.46(0.06-94.90)                       | 0.63                  | 0.41(0.04-3.74)            | 0.43                  | 0.66(0.05-8.77) | 0.75                  | 0.69(0.06-8.51)  | 0.77                  |
| <i>Op. Def. Problems</i>       | 1.00(0.92-1.10) | 0.93                  | 7.75(0.61-98.24)                       | 0.11                  | N/A                      | N/A                   | N/A                                    | N/A                   | 4.32(0.38-49.21)           | 0.24                  | N/A             | N/A                   | N/A              | N/A                   |

<sup>1</sup>*p*-values were obtained by logistic regression analysis (Wald method). Dichotomized scales for binary logistic regression: normal and borderline/clinical pathology. Bold: *p* value <0.05. ADHD: Attention Deficit/Hyperactivity Disorders; CI: Confidence Interval; EF: Experimental infant formula; N/A: Not available; OR: Odds Ratio; Op. Def.: Oppositional Defiant; Perv. Develop: Pervasive Developmental; SF: Standard infant formula. Not available data were excluded directly by the model.

**Table S4.** Association of maternal educational level, socioeconomic status, place of residence and three COGNIS study groups with children behavioral outcomes at 2.5 years old.

| CBCL Scales                    | Maternal educational level (Primary) |                       | Socioeconomic Status (Low)* |                       | Place of residence (Urban) |                       | SF group         |                       | EF group         |                       |
|--------------------------------|--------------------------------------|-----------------------|-----------------------------|-----------------------|----------------------------|-----------------------|------------------|-----------------------|------------------|-----------------------|
|                                | OR (95% CI)                          | <i>p</i> <sup>1</sup> | OR (95% CI)                 | <i>p</i> <sup>1</sup> | OR (95% CI)                | <i>p</i> <sup>1</sup> | OR (95% CI)      | <i>p</i> <sup>1</sup> | OR (95% CI)      | <i>p</i> <sup>1</sup> |
| <i>Internalizing Problems</i>  | 6.33(1.24-32.38)                     | <b>0.027</b>          | 0.40(0.02-7.34)             | 0.54                  | 0.94(0.22-3.94)            | 0.93                  | 2.14(0.55-8.36)  | 0.28                  | 0.74(0.19-2.86)  | 0.66                  |
| <i>Externalizing Problems</i>  | 13.33(1.99-89.32)                    | <b>0.008</b>          | N/A                         | N/A                   | 1.81(0.46-7.20)            | 0.40                  | 0.54(0.08-3.45)  | 0.51                  | 0.37(0.07-1.90)  | 0.23                  |
| <i>Total Problems</i>          | 9.50(1.89-47.61)                     | <b>0.006</b>          | 0.61(0.04-9.99)             | 0.73                  | 1.90(0.55-6.47)            | 0.31                  | 1.28(0.26-6.31)  | 0.76                  | 0.79(0.18-3.53)  | 0.76                  |
| <i>Affective Problems</i>      | 4.96(0.32-77.93)                     | 0.25                  | 0.92(0.03-31.82)            | 0.96                  | 1.62(0.28-9.34)            | 0.59                  | 0.67(0.15-3.10)  | 0.61                  | 0.15(0.02-1.33)  | 0.09                  |
| <i>Anxiety Problems</i>        | 6.33(1.24-32.38)                     | <b>0.027</b>          | 0.54(0.02-12.77)            | 0.70                  | 1.92(0.47-7.85)            | 0.36                  | 0.49(0.07-3.36)  | 0.47                  | 0.56(0.11-2.81)  | 0.48                  |
| <i>Perv. Develop. Problems</i> | N/A                                  | N/A                   | N/A                         | N/A                   | 0.49(0.13-1.87)            | 0.30                  | 6.96(0.76-63.60) | 0.09                  | 7.00(0.81-60.20) | 0.08                  |
| <i>ADHD</i>                    | N/A                                  | N/A                   | N/A                         | N/A                   | N/A                        | N/A                   | N/A              | N/A                   | N/A              | N/A                   |
| <i>Op. Def. Problems</i>       | N/A                                  | N/A                   | N/A                         | N/A                   | 0.99(0.08-12.46)           | 0.99                  | 1.00(0.05-20.76) | 1.00                  | 2.15(0.19-24.71) | 0.54                  |

<sup>1</sup>*p*-values were obtained by logistic regression analysis (Wald method). Dichotomized scales for binary logistic regression: normal and borderline/clinical pathology. Bold: *p* value <0.05. ADHD: Attention Deficit/Hyperactivity Disorders; CI: Confidence Interval; EF: Experimental infant formula; N/A: Not available; OR: Odds Ratio; Op. Def.: Oppositional Defiant; Perv. Develop: Pervasive Developmental; SF: Standard infant formula. \*Low socioeconomic status were defined as monthly income less than EUR 1000. Not available data were excluded directly by the model.
